# Supplementary material for: Effectiveness of passive sampling for the detection and genetic characterization of human viruses in wastewater
Source: Royal Society of Chemistry journal article supplement (doi:10.1039/d2ew00867j), 2023-01-01
Supplement: d2ew00867j1.pdf [file d2ew00867j1.pdf]

**Supplementary table 1.** Quantification of SARS-CoV-2, JCPyV and HAdV in GC/L at the waste water treatment plant (WWTP) and the nursing home (NH).

AS: Active sampling, PS: passive sampling.

| Sampling date | Replicate | SARS-CoV-2 N1 |          |          |          | JCPyV    |          |          |          | HAdV     |          |          |          |
|---------------|-----------|---------------|----------|----------|----------|----------|----------|----------|----------|----------|----------|----------|----------|
|               |           | WWTP          |          | NH       |          | WWTP     |          | NH       |          | WWTP     |          | NH       |          |
|               |           | AS            | PS       | AS       | PS       | AS       | PS       | AS       | PS       | AS       | PS       | AS       | PS       |
| 10/01/2022    | 1         | 6,01E+05      | ND       | ND       | 1,08E+01 | 9,07E+05 | ND       | 9,09E+05 | 4,81E+02 | 4,70E+04 | ND       | ND       | ND       |
|               | 2         | 4,06E+04      | ND       | 1,08E+04 | ND       | 1,13E+07 | 9,75E+02 | 6,67E+05 | ND       | 2,18E+04 | 2,09E+03 | ND       | 3,93E+01 |
| 13/01/2022    | 1         | 1,49E+05      | ND       | ND       | 5,71E+00 | 8,08E+05 | 4,38E+01 | 1,71E+05 | 6,25E+02 | 5,02E+04 | 2,63E+02 | ND       | 5,39E-01 |
|               | 2         | 1,98E+05      | ND       | ND       | 5,44E+01 | ND       | 3,49E+01 | 6,72E+02 | 1,37E+03 | ND       | 5,68E+00 | 3,24E+02 | 3,42E+00 |
| 20/01/2022    | 1         | 1,30E+06      | ND       | 1,07E+04 | ND       | 1,91E+06 | 4,24E+02 | 1,48E+05 | 1,77E+02 | 1,34E+05 | 2,02E+03 | ND       | ND       |
|               | 2         | 1,52E+06      | ND       | ND       | ND       | 2,56E+06 | 7,37E+01 | 1,87E+05 | 2,34E+02 | 5,42E+04 | 2,96E+02 | ND       | ND       |
| 25/01/2022    | 1         | 1,92E+06      | 6,47E+02 | 2,45E+05 | 3,83E+02 | 1,47E+06 | 9,71E+02 | 3,16E+04 | 3,82E+02 | 3,85E+04 | 2,88E+03 | ND       | 2,84E+00 |
|               | 2         | 1,87E+06      | 2,97E+01 | ND       | 2,66E+02 | 1,78E+06 | 7,12E+01 | 1,46E+05 | 1,78E+02 | 1,05E+05 | 4,73E+02 | ND       | 1,24E+00 |
| 27/01/2022    | 1         | 1,23E+05      | ND       | 2,97E+05 | 2,45E+02 | 1,08E+06 | 1,23E+02 | 2,09E+05 | 1,03E+02 | 7,69E+04 | 7,84E+01 | ND       | 2,65E+00 |
|               | 2         | 5,84E+04      | 1,61E+02 | ND       | 3,48E+01 | 7,92E+05 | 1,05E+02 | 1,32E+05 | 1,01E+02 | 3,28E+04 | 1,96E+02 | ND       | ND       |
| 01/02/2022    | 1         | 1,40E+05      | 1,29E+02 | 1,37E+05 | 4,49E+02 | 1,45E+06 | 1,10E+03 | 1,32E+05 | 2,56E+02 | 6,74E+04 | 5,61E+03 | ND       | ND       |
|               | 2         | 1,30E+05      | ND       | 9,05E+04 | 2,42E+02 | 2,94E+06 | 1,05E+02 | 1,38E+05 | 4,89E+02 | 1,11E+05 | 3,59E+02 | ND       | ND       |
| 08/02/2022    | 1         | 2,10E+05      | 3,55E+01 | 4,28E+05 | 2,54E+02 | 8,57E+05 | 3,57E+02 | 1,49E+05 | 2,05E+02 | 7,76E+03 | 5,25E+02 | 2,21E+02 | ND       |
|               | 2         | 5,51E+04      | 4,72E+01 | 7,40E+04 | 3,95E+02 | 7,22E+05 | 3,40E+02 | 1,11E+05 | 2,13E+02 | 2,83E+04 | 6,64E+01 | ND       | 4,83E+00 |
| 10/02/2022    | 1         | ND            | ND       | ND       | 4,57E+01 | 9,35E+05 | 1,48E+02 | 8,57E+04 | 1,70E+02 | 2,56E+05 | 1,02E+02 | ND       | 6,60E+00 |
|               | 2         | 5,53E+03      | 1,09E+01 | ND       | ND       | 8,04E+05 | 6,31E+02 | 1,45E+05 | 6,32E+01 | 9,91E+04 | 4,31E+02 | 3,14E+02 | 2,57E+00 |
| 17/02/2022    | 1         | 3,08E+04      | 1,23E+01 | 6,81E+04 | 8,19E-01 | 3,71E+05 | ND       | 5,89E+04 | ND       | 7,99E+04 | ND       | ND       | ND       |
|               | 2         | 3,08E+04      | ND       | 5,10E+04 | ND       | 4,62E+05 | 6,23E+02 | 3,79E+04 | 1,17E+02 | 3,24E+04 | 2,34E+03 | 1,87E+03 | ND       |
| 22/02/2022    | 1         | 8,19E+04      | ND       | ND       | ND       | 1,21E+06 | 2,19E+02 | 3,12E+04 | 1,07E+02 | 2,56E+05 | 8,01E+02 | ND       | ND       |
|               | 2         | 3,91E+04      | ND       | ND       | ND       | 4,98E+05 | 8,93E+01 | 3,75E+04 | 5,77E+01 | 9,92E+04 | 1,86E+02 | ND       | ND       |
| 24/02/2022    | 1         | 5,95E+03      | ND       | ND       | ND       | 6,31E+05 | 9,01E+02 | 6,31E+05 | 3,95E+02 | 5,05E+04 | 9,46E+02 | ND       | ND       |
|               | 2         | ND            | ND       | ND       | ND       | 4,11E+05 | 1,55E+03 | 4,11E+05 | ND       | 1,34E+02 | 1,14E+03 | ND       | ND       |
| 01/03/2022    | 1         | 8,58E+04      | ND       | ND       | ND       | 9,54E+05 | 6,92E+01 | 1,18E+04 | 2,82E+02 | 2,13E+05 | 1,08E+03 | ND       | ND       |
|               | 2         | 8,76E+04      | ND       | ND       | 5,74E+02 | 1,84E+06 | 3,93E+02 | 3,79E+04 | 4,49E+02 | 3,05E+05 | 3,34E+03 | ND       | ND       |
| 03/03/2022    | 1         | 1,06E+04      | ND       | ND       | ND       | 2,00E+05 | 1,07E+01 | 3,18E+04 | 6,77E+01 | 6,59E+04 | 6,08E+02 | ND       | 1,30E+00 |
|               | 2         | 1,19E+04      | ND       | ND       | ND       | 2,56E+05 | 2,63E+01 | 2,89E+04 | ND       | 3,59E+04 | 7,98E+01 | ND       | 9,39E-01 |
| 10/03/2022    | 1         | 2,61E+04      | ND       | ND       | ND       | 1,30E+05 | ND       | 1,87E+04 | 1,58E+01 | 5,15E+04 | ND       | ND       | ND       |
|               | 2         | 6,35E+03      | ND       | ND       | 3,53E+01 | 1,52E+05 | 1,14E+01 | 1,35E+04 | 1,69E+01 | 4,86E+04 | 2,75E+02 | ND       | ND       |
| 22/03/2022    | 1         | 8,19E+04      | ND       | ND       | ND       | 1,21E+06 | 2,19E+02 | 3,12E+04 | 1,07E+02 | 1,74E+05 | 1,73E+03 | ND       | 2,13E+00 |
|               | 2         | 3,91E+04      | ND       | ND       | ND       | 4,98E+05 | 8,93E+01 | 3,75E+04 | 5,77E+01 | 1,36E+05 | 4,13E+03 | ND       | 2,27E+00 |
