# Supplementary material for: Effectiveness of passive sampling for the detection and genetic characterization of human viruses in wastewater
Source: Royal Society of Chemistry journal article supplement (doi:10.1039/d2ew00867j), 2023-01-01
Supplement: d2ew00867j4.pdf [file d2ew00867j4.pdf]

**Supplementary table 2.** Quantification and semi-quantification of SARS-CoV-2 (N1 and N2 assays), JCPyV, HAdV, EV, RoV and NoV GI and GII in GC/L at the waste water treatment plant (WWTP).

AS: Active sampling, PS: passive sampling.

| Sampling date | Replicate | WWTP          |          |               |          |          |          |          |          |          |          |          |          |          |          |          |          |
|---------------|-----------|---------------|----------|---------------|----------|----------|----------|----------|----------|----------|----------|----------|----------|----------|----------|----------|----------|
|               |           | SARS-CoV-2 N1 |          | SARS-CoV-2 N2 |          | JCPyV    |          | HAdV     |          | EV       |          | RoV      |          | NoV GI   |          | NoV GII  |          |
|               |           | AS            | PS       | AS            | PS       | AS       | PS       | AS       | PS       | AS       | PS       | AS       | PS       | AS       | PS       | AS       | PS       |
| 10/1/2022     | 1         | 6.01E+05      | ND       | 3.50E+05      | ND       | 9.07E+05 | ND       | 4.70E+04 | ND       | 8.49E+06 | ND       | 1.85E+06 | ND       | 3.33E+05 | ND       | 2.72E+05 | ND       |
|               | 2         | 4.06E+04      | ND       | 1.22E+04      | ND       | 1.13E+07 | 9.75E+02 | 2.18E+04 | 2.09E+03 | 4.21E+06 | ND       | 1.91E+06 | ND       | 2.39E+05 | 6.75E+00 | 2.03E+05 | 2.19E+01 |
| 13/1/2022     | 1         | 1.49E+05      | ND       | 6.23E+05      | ND       | 8.08E+05 | 4.38E+01 | 5.02E+04 | 2.63E+02 | 3.53E+06 | 2.71E+02 | 4.56E+06 | ND       | 2.01E+05 | ND       | 2.65E+03 | 8.11E+00 |
|               | 2         | 1.98E+05      | ND       | ND            | ND       | ND       | 3.49E+01 | ND       | 5.68E+00 | ND       | 1.01E+02 | ND       | ND       | ND       | ND       | ND       | ND       |
| 20/1/2022     | 1         | 1.30E+06      | ND       | 5.59E+05      | ND       | 1.91E+06 | 4.24E+02 | 1.34E+05 | 2.02E+03 | 2.53E+06 | ND       | 2.53E+06 | ND       | 2.46E+05 | ND       | 3.12E+05 | ND       |
|               | 2         | 1.52E+06      | ND       | 5.45E+05      | ND       | 2.56E+06 | 7.37E+01 | 5.42E+04 | 2.96E+02 | 1.79E+06 | ND       | 3.80E+06 | ND       | 2.66E+05 | ND       | 3.53E+05 | ND       |
| 25/1/2022     | 1         | 1.92E+06      | 6.47E+02 | 7.21E+01      | 1.47E+06 | 9.71E+02 | 3.85E+04 | 2.88E+03 | 1.35E+05 | ND       | ND       | ND       | 7.77E+04 | 7.18E+01 | 5.95E+04 | 2.01E+00 |          |
|               | 2         | 1.87E+06      | 2.97E+01 | 4.94E+02      | ND       | 1.78E+06 | 7.12E+01 | 1.05E+05 | 4.73E+02 | 1.69E+06 | ND       | 2.82E+06 | ND       | 2.02E+05 | ND       | 3.30E+05 | ND       |
| 27/1/2022     | 1         | 1.23E+05      | ND       | 2.47E+02      | ND       | 1.08E+06 | 1.23E+02 | 7.69E+04 | 7.84E+01 | 2.57E+06 | ND       | 4.01E+06 | ND       | 1.22E+05 | 1.87E+01 | 1.29E+05 | 1.67E+01 |
|               | 2         | 5.84E+04      | 1.61E+02 | 4.80E+01      | 3.35E+01 | 7.92E+05 | 1.05E+02 | 3.28E+04 | 1.96E+02 | 3.99E+06 | ND       | 1.73E+07 | ND       | 1.74E+05 | ND       | 2.75E+05 | 7.72E+01 |
| 1/2/2022      | 1         | 1.40E+05      | 1.29E+02 | 7.10E+01      | 5.09E-01 | 1.45E+06 | 1.10E+03 | 6.74E+04 | 5.61E+03 | 3.24E+06 | ND       | 3.54E+06 | ND       | 2.39E+05 | 1.91E+01 | 1.90E+05 | 1.20E+01 |
|               | 2         | 1.30E+05      | ND       | 5.96E+02      | 2.17E+02 | 2.94E+06 | 1.05E+02 | 1.11E+05 | 3.59E+02 | 3.25E+06 | ND       | 5.31E+06 | ND       | 4.09E+05 | 1.13E-01 | 2.63E+05 | ND       |
| 8/2/2022      | 1         | 2.10E+05      | 3.55E+01 | 4.15E+04      | 1.76E+00 | 8.57E+05 | 3.57E+02 | 7.76E+03 | 5.25E+02 | 3.40E+05 | 6.81E+03 | ND       | 8.27E+03 | 2.69E+05 | 1.94E+02 | 5.85E+04 | 2.66E+02 |
|               | 2         | 5.51E+04      | 4.72E+01 | 3.45E+04      | 2.02E+01 | 7.22E+05 | 3.40E+02 | 2.83E+04 | 6.64E+01 | 8.38E+06 | ND       | 7.43E+06 | ND       | 2.42E+05 | 3.30E+01 | 1.66E+05 | 3.92E+01 |
| 10/2/2022     | 1         | ND            | ND       | 8.83E+04      | ND       | 9.35E+05 | 1.48E+02 | 2.56E+05 | 1.02E+02 | 7.90E+06 | ND       | ND       | ND       | 2.58E+05 | ND       | 3.95E+05 | 1.20E+01 |
|               | 2         | 5.53E+03      | 1.09E+01 | 1.88E+05      | ND       | 8.04E+05 | 6.31E+02 | 9.91E+04 | 4.31E+02 | 1.16E+07 | 1.64E+03 | 6.82E+07 | 9.01E+02 | 2.14E+05 | ND       | 1.95E+05 | ND       |
| 17/2/2022     | 1         | 3.08E+04      | 1.23E+01 | 2.37E+04      | ND       | 3.71E+05 | ND       | 7.99E+04 | ND       | 9.52E+06 | ND       | 9.06E+06 | ND       | 2.78E+05 | ND       | 2.62E+05 | ND       |
|               | 2         | 3.08E+04      | ND       | 4.30E+04      | 1.62E+01 | 4.62E+05 | 6.23E+02 | 3.24E+04 | 2.34E+03 | 1.32E+07 | ND       | 4.98E+06 | 2.82E+03 | 3.47E+05 | ND       | 2.90E+05 | 5.68E+00 |
| 22/2/2022     | 1         | 8.19E+04      | ND       | 1.33E+05      | ND       | 1.21E+06 | 2.19E+02 | 2.56E+05 | 8.01E+02 | 9.39E+06 | ND       | 2.22E+07 | 1.81E+03 | 9.12E+05 | 4.45E+00 | 7.36E+05 | 1.12E+00 |
|               | 2         | 3.91E+04      | ND       | 3.81E+04      | ND       | 4.98E+05 | 8.93E+01 | 9.92E+04 | 1.86E+02 | 5.09E+06 | ND       | 1.23E+07 | 1.46E+03 | 3.47E+05 | 8.13E+00 | 2.10E+05 | 1.13E+00 |
| 24/2/2022     | 1         | 5.95E+03      | ND       | 4.74E+01      | 9.28E+00 | 6.31E+05 | 9.01E+02 | 5.05E+04 | 9.46E+02 | 8.59E+06 | ND       | 7.56E+06 | 1.33E+04 | 4.40E+05 | ND       | 3.43E+05 | 1.12E+00 |
|               | 2         | ND            | ND       | ND            | ND       | 4.11E+05 | 1.55E+03 | 1.34E+02 | 1.14E+03 | ND       | ND       | ND       | ND       | 2.05E+04 | 3.57E+00 | 4.15E+02 | 4.51E+00 |
| 1/3/2022      | 1         | 8.58E+04      | ND       | 1.35E+05      | ND       | 9.54E+05 | 6.92E+01 | 2.13E+05 | 1.08E+03 | 2.40E+07 | ND       | 4.08E+07 | ND       | 8.44E+05 | ND       | 3.33E+05 | ND       |
|               | 2         | 8.76E+04      | ND       | 2.70E+05      | ND       | 1.84E+06 | 3.93E+02 | 3.05E+05 | 3.34E+03 | 2.17E+07 | ND       | 6.54E+07 | ND       | 1.13E+06 | ND       | 5.36E+05 | ND       |
| 3/3/2022      | 1         | 1.06E+04      | ND       | 8.16E+03      | ND       | 2.00E+05 | 1.07E+01 | 6.59E+04 | 6.08E+02 | 6.14E+06 | ND       | 2.45E+07 | ND       | 7.32E+05 | ND       | 3.27E+05 | ND       |
|               | 2         | 1.19E+04      | ND       | 1.17E+04      | ND       | 2.56E+05 | 2.63E+01 | 3.59E+04 | 7.98E+01 | 8.78E+06 | ND       | 1.42E+07 | ND       | 6.21E+05 | ND       | 2.90E+05 | ND       |
| 10/3/2022     | 1         | 2.61E+04      | ND       | 3.56E+02      | ND       | 1.30E+05 | ND       | 5.15E+04 | ND       | 3.80E+06 | ND       | 1.60E+07 | 5.67E+04 | 5.00E+05 | ND       | 2.08E+05 | ND       |
|               | 2         | 6.35E+03      | ND       | 2.56E+04      | ND       | 1.52E+05 | 1.14E+01 | 4.86E+04 | 2.75E+02 | 7.14E+06 | ND       | 2.95E+07 | ND       | 6.95E+05 | ND       | 2.90E+05 | ND       |
| 22/3/2022     | 1         | 8.19E+04      | ND       | 4.29E+04      | 3.91E+01 | 1.21E+06 | 2.19E+02 | 1.74E+05 | 1.73E+03 | 4.12E+06 | ND       | 6.00E+06 | 2.11E+04 | 2.83E+05 | 8.18E+01 | 1.47E+05 | 4.06E+01 |
|               | 2         | 3.91E+04      | ND       | 4.23E+04      | 1.23E+02 | 4.98E+05 | 8.93E+01 | 1.36E+05 | 4.13E+03 | 5.66E+06 | ND       | 9.68E+06 | ND       | 3.57E+05 | 6.59E+01 | 1.52E+05 | 8.17E+01 |
